# Supplementary material
Source: Springer Nature journal article supplement (https://www.springermedizin.de/resource/supplementary/12885_2014_5115_MOESM6_ESM.pdf/9468154)

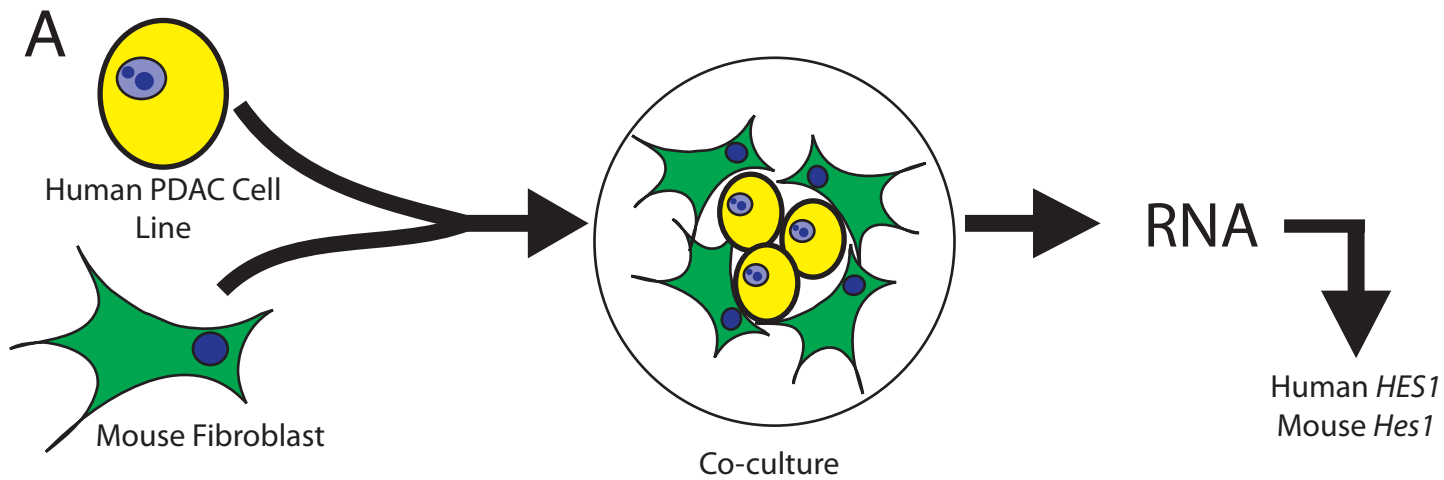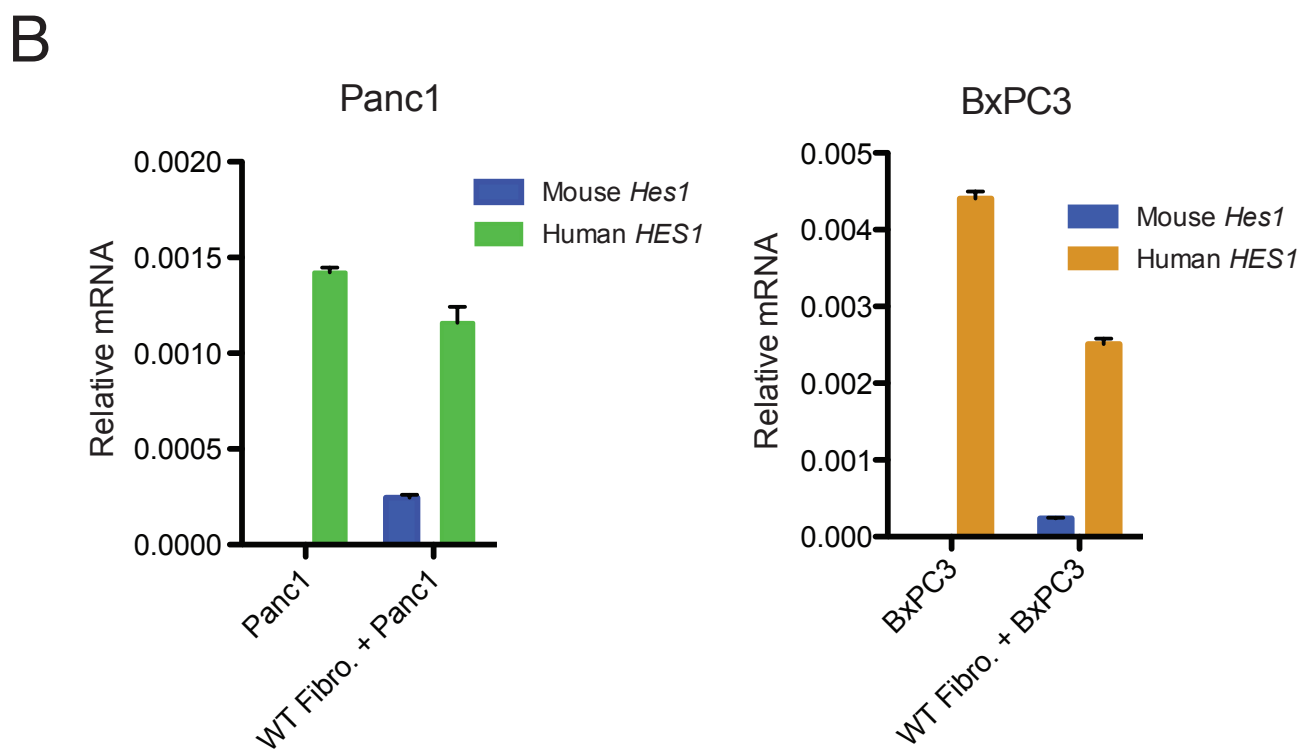

Supplement: MOESM6 [file 9468154]
